# Supplementary material for: Sulfur-doped amorphous NiMoO4 on crystalline Fe2O3 nanorods for enhanced lithium storage performance
Source: Royal Society of Chemistry journal article supplement (doi:10.1039/c8ta08938h), 2018-01-01
Supplement: c8ta08938h1.pdf [file c8ta08938h1.pdf]

Sulfur doped amorphous NiMoO<sub>4</sub> on crystalline Fe<sub>2</sub>O<sub>3</sub> nanosheets for enhanced  
lithium storage performance

Hailong Yue, Guangming Wang, Rencheng Jin,\* Qingyao Wang, Yuming Cui,\*

Shanmin Gao

School of Chemistry & Materials Science, Ludong University, Yantai 264025, P. R.

China. \*E-mail: jinrc427@126.com, cmygood2007@163.com

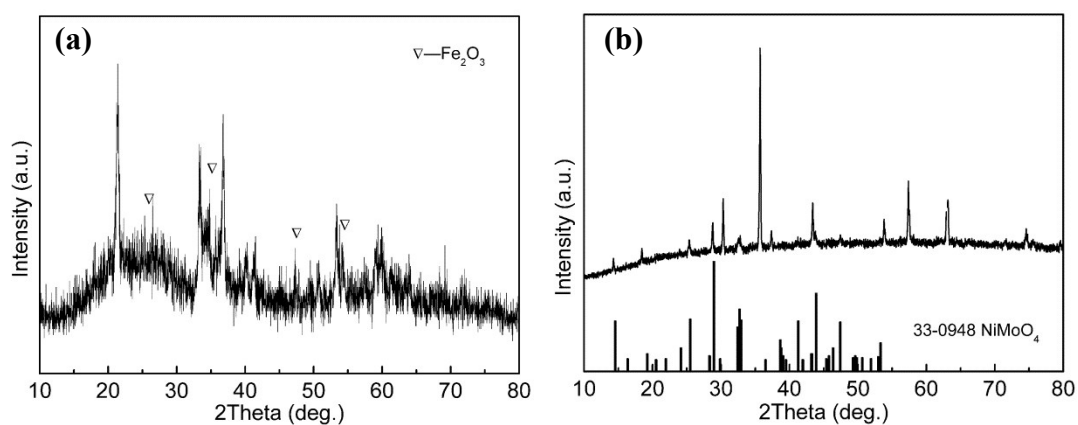

Fig. S1 (a) XRD pattern of the obtained precursors, XRD pattern of the Fe<sub>2</sub>O<sub>3</sub>@NiMoO<sub>4</sub>-S after calcination at 800 °C for 5 h.

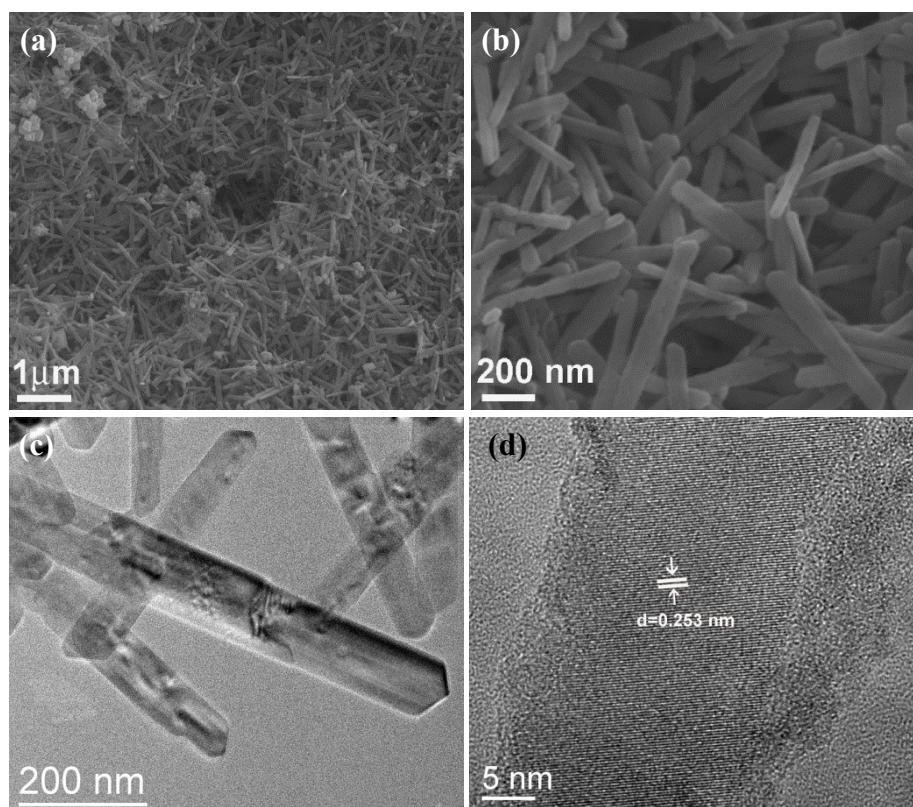

Fig. S2 (a, b) FESEM images of the  $\text{Fe}_2\text{O}_3@\text{C}$ , (c) TEM and (d) corresponding HRTEM images of the  $\text{Fe}_2\text{O}_3@\text{C}$ .

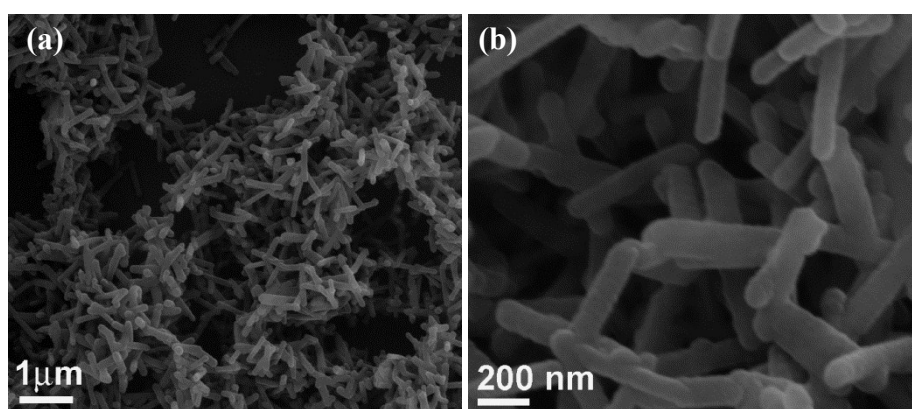

Fig. S3 (a, b) FESEM images of the Fe<sub>2</sub>O<sub>3</sub>@NiMoO<sub>4</sub>.

**Table S1.** The composition of the obtained samples.

| Samples                                               | Fe:Ni:Mo:S         |
|-------------------------------------------------------|--------------------|
| Fe <sub>2</sub> O <sub>3</sub> @NiMoO <sub>4</sub> -S | 1:0.412:0.426:0.12 |
| Fe <sub>2</sub> O <sub>3</sub> @NiMoO <sub>4</sub>    | 1:0.401:0.422:0    |

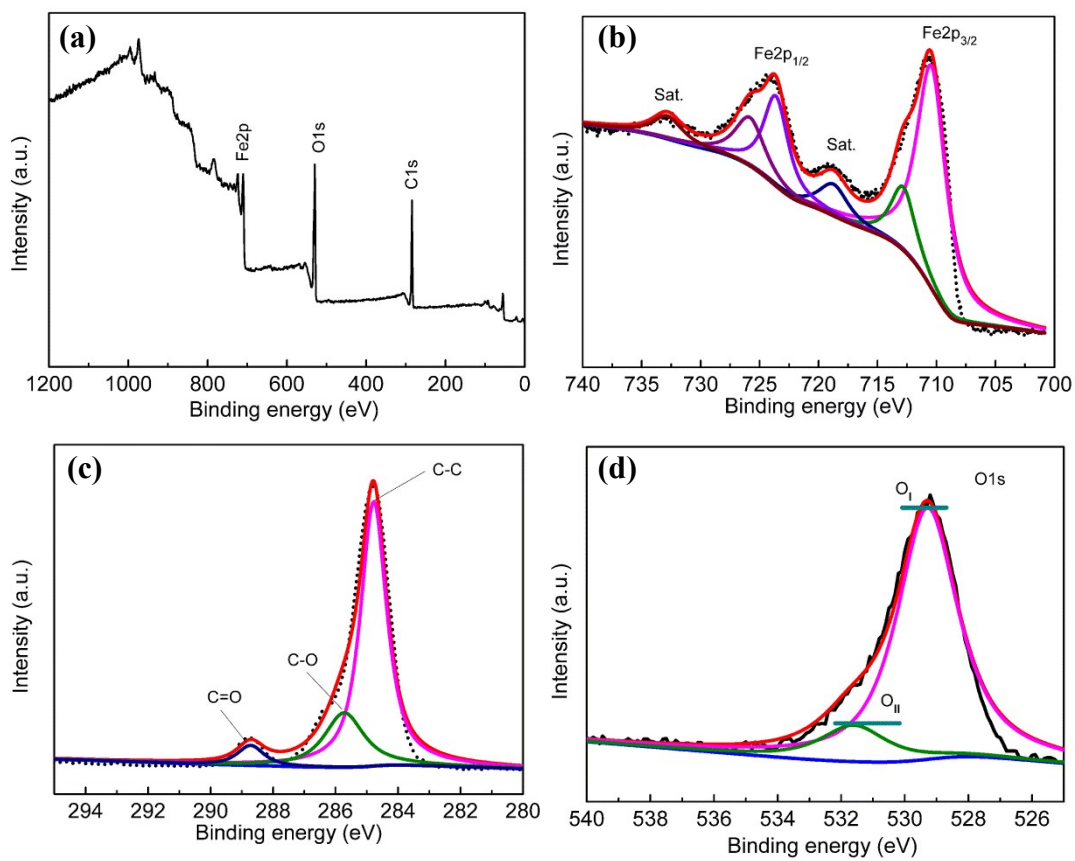

Fig. S4 XPS spectra of the obtained  $\text{Fe}_2\text{O}_3@\text{C}$ : (a) survey spectrum, (b) Fe 2p, (c) C 1s, (d) O 1s.

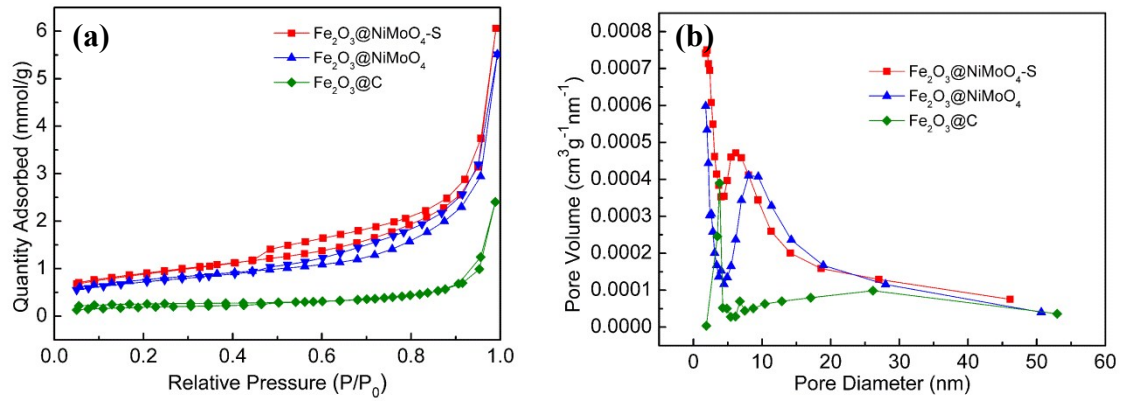

Fig. S5 (a) Nitrogen gas adsorption/desorption isotherm and (b) size distribution of the  $\text{Fe}_2\text{O}_3@NiMoO_4\text{-S}$ ,  $\text{Fe}_2\text{O}_3@NiMoO_4$  and  $\text{Fe}_2\text{O}_3@C$ .

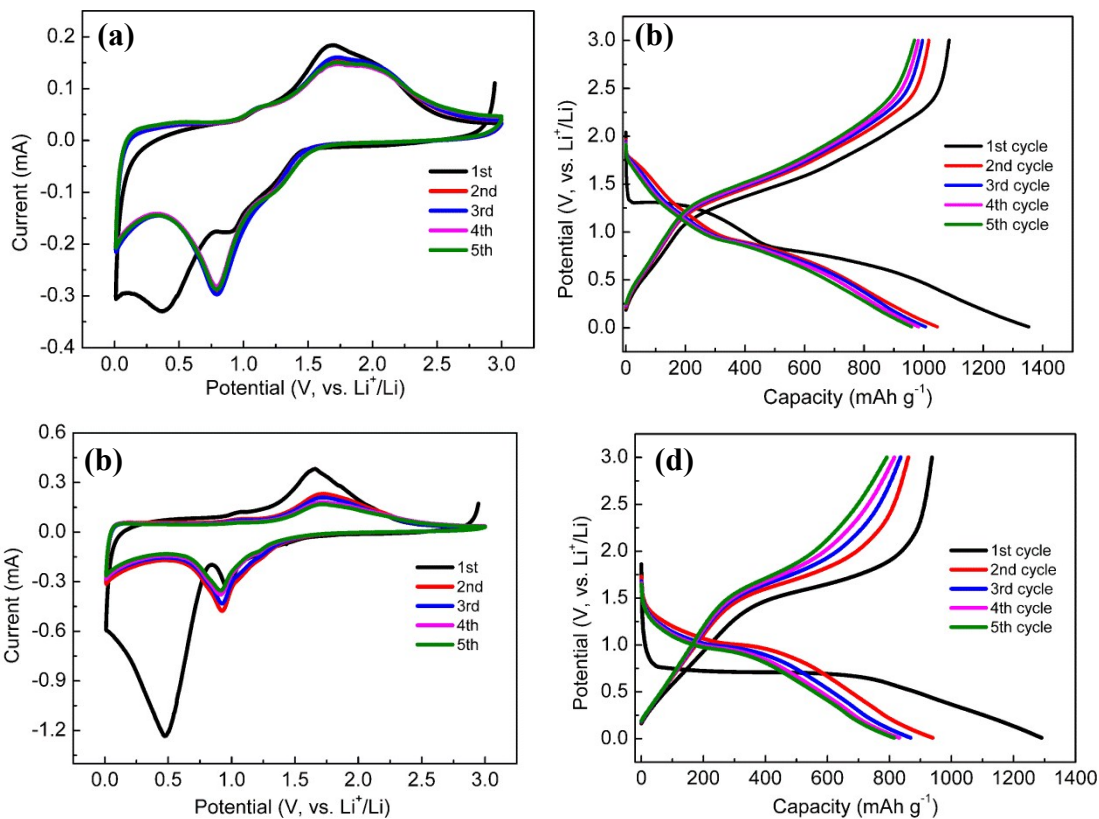

Fig. S6 (a) CV curves of the  $\text{Fe}_2\text{O}_3@\text{NiMoO}_4$  over the voltage range of 0.01-3.0 V at a scan rate of  $0.2 \text{ mV s}^{-1}$ . (b) Charge/discharge voltage profiles of the  $\text{Fe}_2\text{O}_3@\text{NiMoO}_4$  at  $0.1 \text{ A g}^{-1}$ . (c) CV curves of the  $\text{Fe}_2\text{O}_3@\text{C}$  over the voltage range of 0.01-3.0 V at a scan rate of  $0.2 \text{ mV s}^{-1}$ . (d) Charge/discharge voltage profiles of the  $\text{Fe}_2\text{O}_3@\text{C}$  at  $0.1 \text{ A g}^{-1}$ .

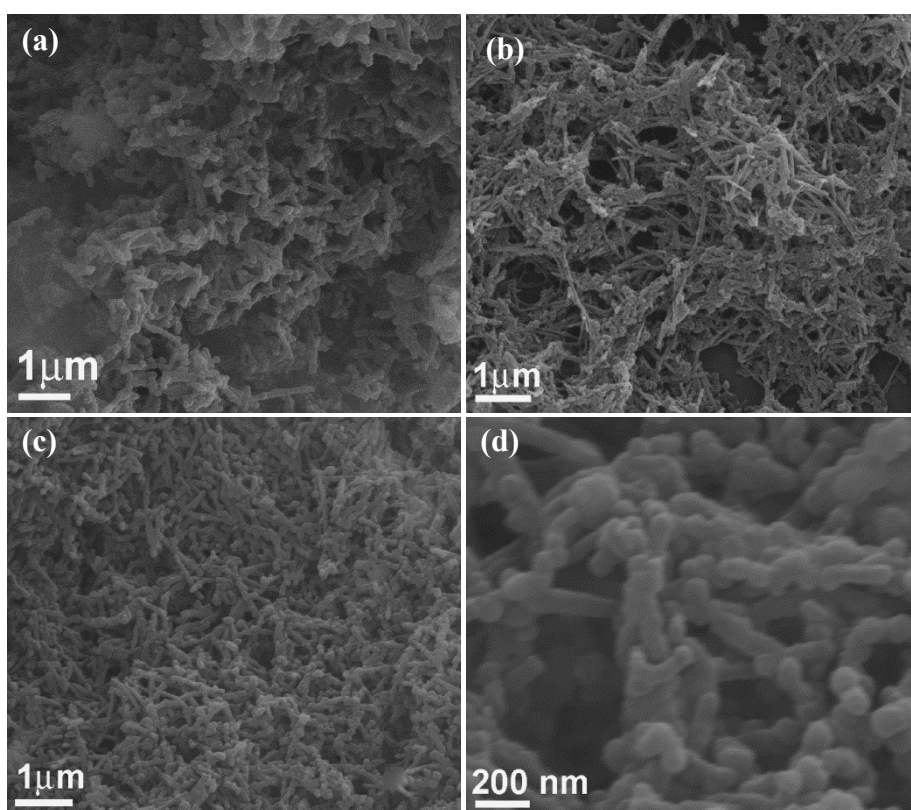

Fig. S7 FESEM images of the electrodes after 100 cycles at the current density of 0.1 A g<sup>-1</sup>: (a) Fe<sub>2</sub>O<sub>3</sub>@C, (b) Fe<sub>2</sub>O<sub>3</sub>@NiMoO<sub>4</sub>, (c, d) Fe<sub>2</sub>O<sub>3</sub>@NiMoO<sub>4</sub>-S.
